# Supplementary material for: Post-Effects of Time-Restricted Feeding against Adipose Tissue Inflammation and Insulin Resistance in Obese Mice
Source: MDPI journal article supplement (doi:10.3390/nu15112617), 2023-06-02
Supplement: s1 [file s1]

# Post-effects of Time-restricted Feeding Against Adipose Tissue Inflammation and Insulin Resistance in Obese Mice

Narae Yun <sup>1</sup>, Jiyeon Nah <sup>1</sup>, Mi Nam Lee <sup>2</sup>, Dayong Wu <sup>3</sup> and Munkyoung Pae <sup>1,\*</sup>

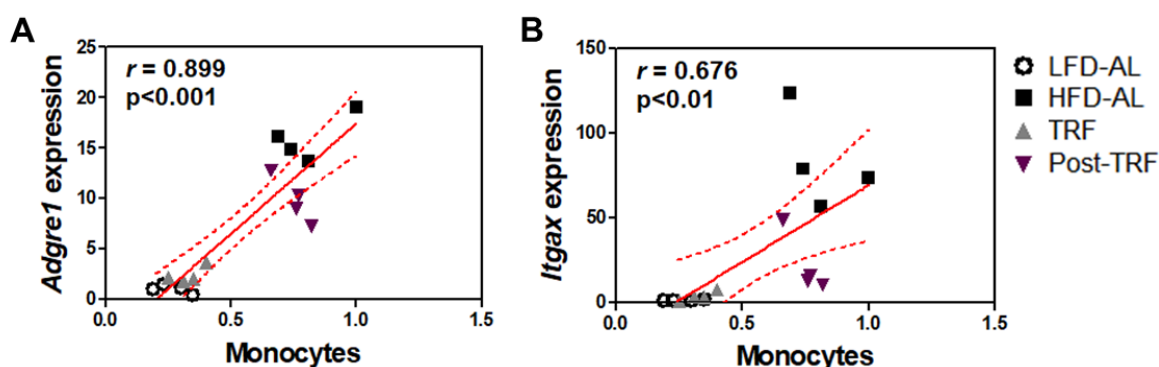

**Figure S1.** Pearson correlation between circulating monocytes and (A) *Adgre1* and (B) *Itgax* mRNA expression in adipose tissue on LFD-AL (open circles), HFD-AL (closed squares), TRF (gray triangles), or Post-TRF (purple reversed triangles),  $n = 4$  per group. LFD-AL, low-fat diet ad libitum for 12 weeks; HFD-AL, high-fat diet ad libitum for 12 weeks; TRF, 6 weeks of time-restricted feeding in mice underwent ad libitum of high-fat diet for 6 weeks; Post-TRF, 4 weeks of TRF, followed by 2 weeks of ad libitum feeding in those underwent ad libitum of high-fat diet for 6 weeks.
